# Supplementary material
Source: PubMed Central journal article supplement (PMC5563739)
Supplement: 12264_2016_17_MOESM1_ESM.pdf [file 12264_2016_17_MOESM1_ESM.pdf]

## Supplementary information

**Table S1. 17 $\beta$ -Estradiol plasma levels at different time points (pg/mL)**

| Treatment             | Day 0 <sup>a</sup><br>(before ovx) | Day 7<br>(The day of<br>SCI) | Day 14         | Day 21         | Day 28         | Day 35         |
|-----------------------|------------------------------------|------------------------------|----------------|----------------|----------------|----------------|
| Estradiol<br>benzoate | 17.7 $\pm$ 2.1                     | 85.5 $\pm$ 8.5               | 87.3 $\pm$ 6.7 | 83.1 $\pm$ 9.5 | 90.1 $\pm$ 7.7 | 86.3 $\pm$ 8.1 |
| Placebo               |                                    | 9.1 $\pm$ 0.3                | 8.7 $\pm$ 0.2  | 9.0 $\pm$ 0.2  | 9.1 $\pm$ 0.2  | 8.9 $\pm$ 0.4  |

<sup>a</sup>Day 0 shows the mean of the rats before ovariectomy.  $n = 30$ .  
Mean  $\pm$  SEM. At least  $n = 6$  per group.
